# Supplementary material for: Development and Optimization of Electrochemical Method for Determination of Vitamin C
Source: MDPI journal article supplement (doi:10.3390/chemosensors10070283), 2022-07-15
Supplement: s1 [file s1]

## Supplementary Materials

# Development and optimization of electrochemical method for determination of Vitamine C

Ivana Škugor Rončević<sup>1</sup>, Danijela Skroza<sup>2</sup>, Ivana Vrca<sup>2</sup>, Ana Marija Kondža<sup>1</sup>, Nives Vladislavić<sup>1\*</sup>

<sup>1</sup> Department of General and Inorganic Chemistry, Faculty of Chemistry and Technology, University of Split, Ruđera Boškovića 35, 21000 Split, Croatia; skugor@ktf-split.hr (I. Š. R.), nives@ktf-split.hr (N. V.) (A.M.K)

<sup>2</sup> Department of Food Technology and Biotechnology, Faculty of Chemistry and Technology, Ruđera Boškovića 35, 21000 Split, Croatia; @ktf-split.hr (D.S.), @ktf-split.hr (I. V.),

\* Correspondence: \*nives@ktf-split.hr (N.V.)

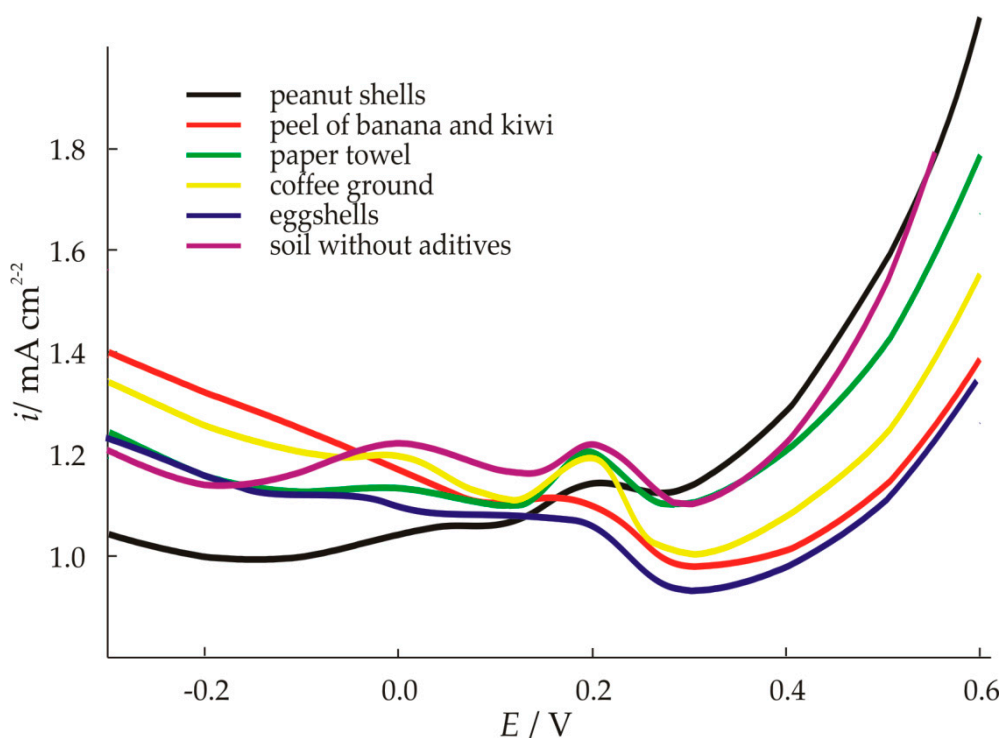

**Figure S1.** The non-subtracted voltammograms for the six examined real samples, from aqueous extracts of arugula.

### *Results of determination of VitC by square wave voltammetry*

Figure S1 shows uncorrected, non-subtracted, voltammograms for the six examined real samples, from aqueous extracts of arugula. One millilitre of sample was added to the electrochemical cell, and the voltammogram of each sample was recorded with optimal parameters. One oxidation current peak was observed on the voltammograms of all tested samples around the potential  $E_a = 0.2$  V which corresponds to the studied oxidation process of VitC. The results of SWV showed that the oxidation current peak VitC shifted positively. Almost all samples showed an additional

anode current peak at a potential close to zero, which may indicate the adsorption or oxidation of other bioactive molecules, e.g. simple phenols or similar low molecular weight compounds.
